# Supplementary material for: Gene expression atlas of fruit ripening and transcriptome assembly from RNA-seq data in octoploid strawberry (Fragaria × ananassa)
Source: PubMed Central journal article supplement (PMC5653846; doi:10.1038/s41598-017-14239-6), 2017-10-23
Supplement: 41598_2017_14239_MOESM1_ESM.pdf [file 41598_2017_14239_MOESM1_ESM.pdf]

## Supplementary Information

### **Gene expression atlas of fruit ripening and transcriptome assembly from RNA-seq data in octoploid strawberry (*Fragaria × ananassa*)**

José F. Sánchez-Sevilla, José G. Vallarino, Sonia Osorio, Aureliano Bombarely, David Posé, Catharina Merchante, Miguel A. Botella, Iraida Amaya, Victoriano Valpuesta

**Supplementary File S1.** Expression values, as FPKM, corresponding to the 28,574 XLOCs as described in Figure 2.

**Supplementary File S2.** Table of the *Fragaria vesca* genes, identified by MapMan analysis, corresponding to the *Fragaria × ananassa* ethylene-related genes differentially expressed in achene in the transition from green (G) to white (W), as shown in Figure 4.

**Supplementary File S3.** Table of the *Fragaria vesca* genes, identified by MapMan analysis, corresponding to the *Fragaria × ananassa* ethylene-related genes differentially expressed in achene in the transition from white (W) to turning (T), as shown in Figure 4.

**Supplementary File S4.** Table of the *Fragaria vesca* genes, identified by MapMan analysis, corresponding to the *Fragaria × ananassa* ethylene-related genes differentially expressed in achene in the transition from turning (T) to red (R), as shown in Figure 4.

**Supplementary File S5.** Table of the *Fragaria vesca* genes, identified by MapMan analysis, corresponding to the *Fragaria × ananassa* ethylene-related genes differentially expressed in receptacle in the transition from green (G) to white (W), as shown in Figure 4.

**Supplementary File S6.** Table of the *Fragaria vesca* genes, identified by MapMan analysis, corresponding to the *Fragaria × ananassa* ethylene-related genes differentially expressed in receptacle in the transition from white (W) to turning (T), as shown in Figure 4.

**Supplementary File S7.** Table of the *Fragaria vesca* genes, identified by MapMan analysis, corresponding to the *Fragaria × ananassa* ethylene-related genes differentially expressed in receptacle in the transition from turning (T) to red (R), as shown in Figure 4.

**Supplementary Files S8.** Trinity isoforms for the 10 RNAseq samples are available at [www.ebi.ac.uk/ena](http://www.ebi.ac.uk/ena), ref. PRJEB12420.RNASEQ, as:  
Transcriptome shotgun assembly (TSA) – UNANNOTATED :HX2000058865

Transcriptome shotgun assembly (TSA) – UNANNOTATED :HX2000058865  
Transcriptome shotgun assembly (TSA) – UNANNOTATED :HX2000058864  
Transcriptome shotgun assembly (TSA) – UNANNOTATED :HX2000058863  
Transcriptome shotgun assembly (TSA) – UNANNOTATED :HX2000058862  
Transcriptome shotgun assembly (TSA) – UNANNOTATED :HX2000058861  
Transcriptome shotgun assembly (TSA) – UNANNOTATED :HX2000058860  
Transcriptome shotgun assembly (TSA) – UNANNOTATED :HX2000058859  
Transcriptome shotgun assembly (TSA) – UNANNOTATED :HX2000058858  
Transcriptome shotgun assembly (TSA) – UNANNOTATED :HX2000058856  
Transcriptome shotgun assembly (TSA) – UNANNOTATED :HX2000058854

**Supplementary File S9.** MIRA contigs, are available at [www.ebi.ac.uk/ena](http://www.ebi.ac.uk/ena), ref. PRJEB12420.RNASEQ, as Transcriptome shotgun assembly (TSA) – UNANNOTATED : HX2000059175

**Supplementary figure S1:** HeatMap of the Metabolism Overview corresponding to the DEGs (File S1) in the successive transitions from green (G), white (W), turning (T) and red (R), in the achene (A) and the receptacle (R), obtained from the MapMan analysis. Abbreviations of the pathways/cycles are CHO: carbohydrate: OPP: oxidative pentose phosphate; TCA: tricarboxylic acid. The color key indicates the log2 fold change between the transitions.

### Green Achene - White Achene

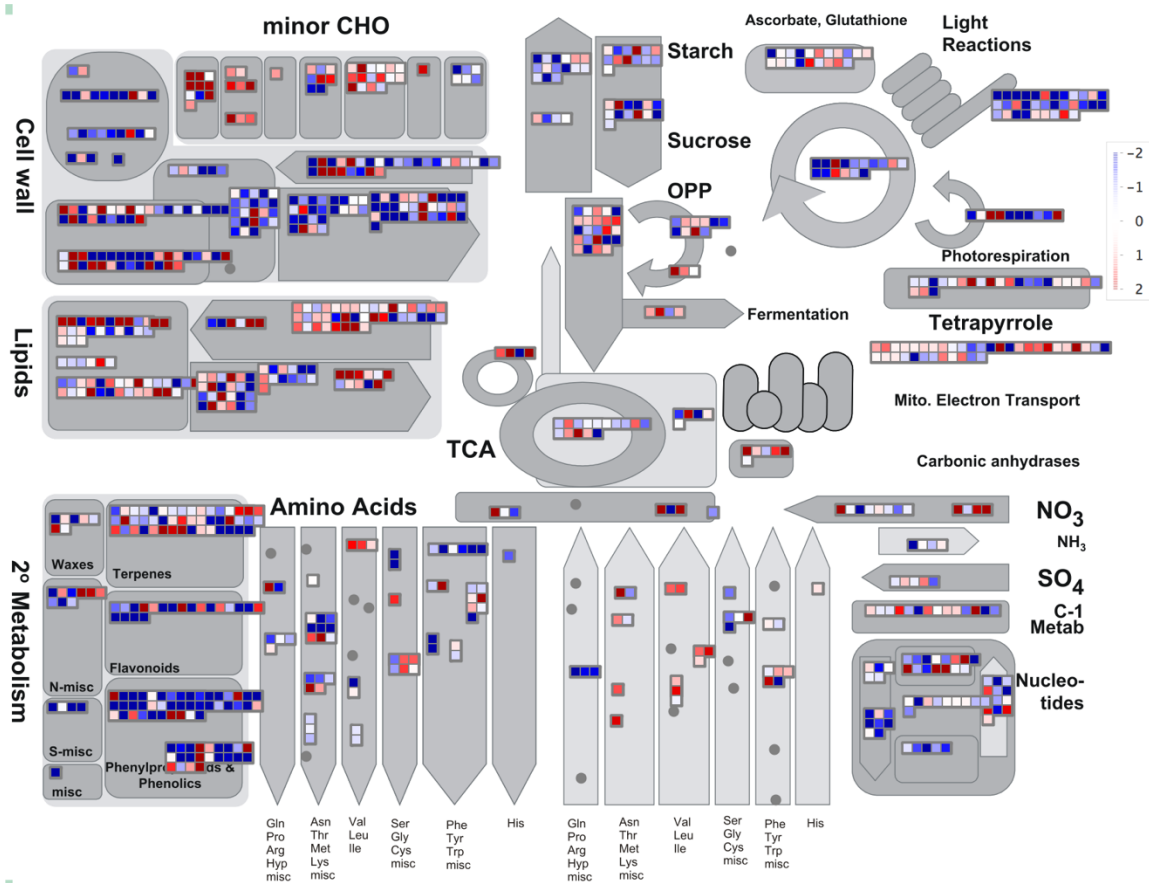

# White Achene - Turning Achene

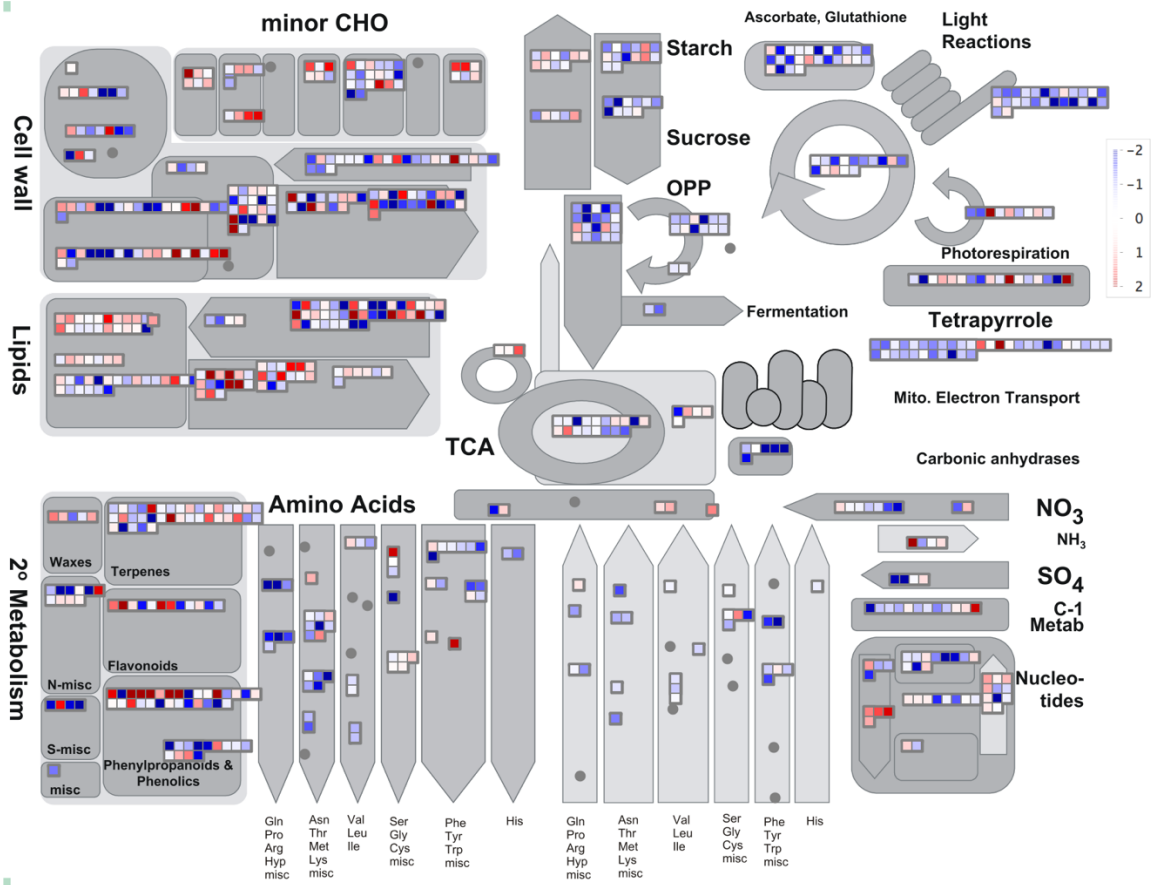

# Turning Achene - Red Achene

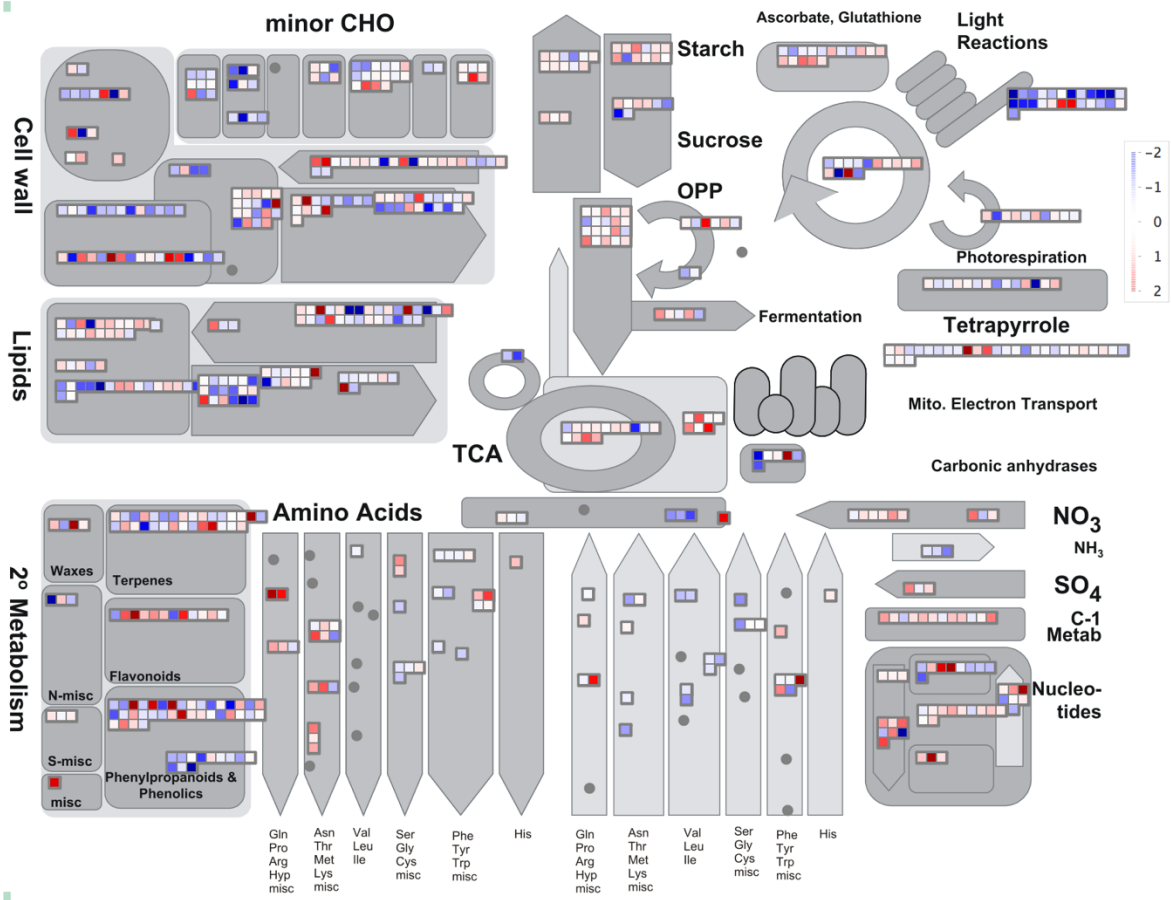

# Green Receptacle - White Receptacle

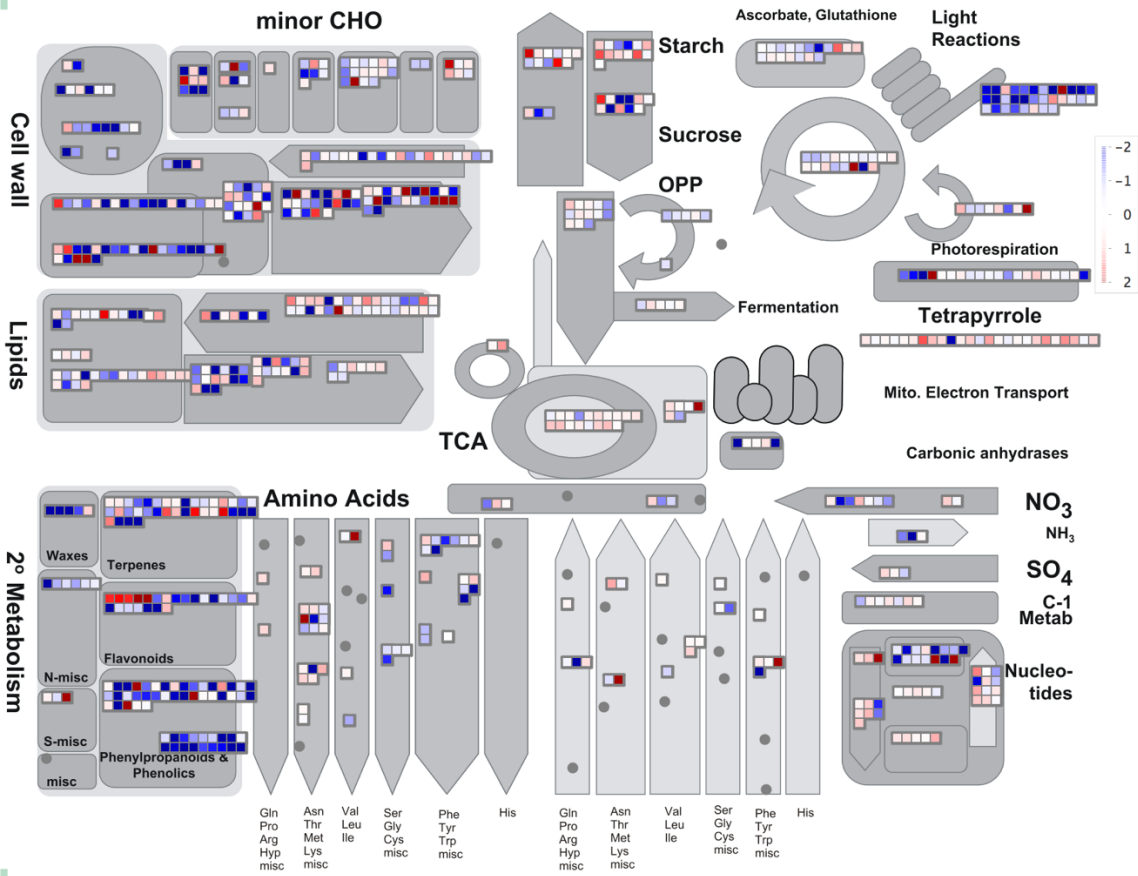

# White Receptacle - Turning Receptacle

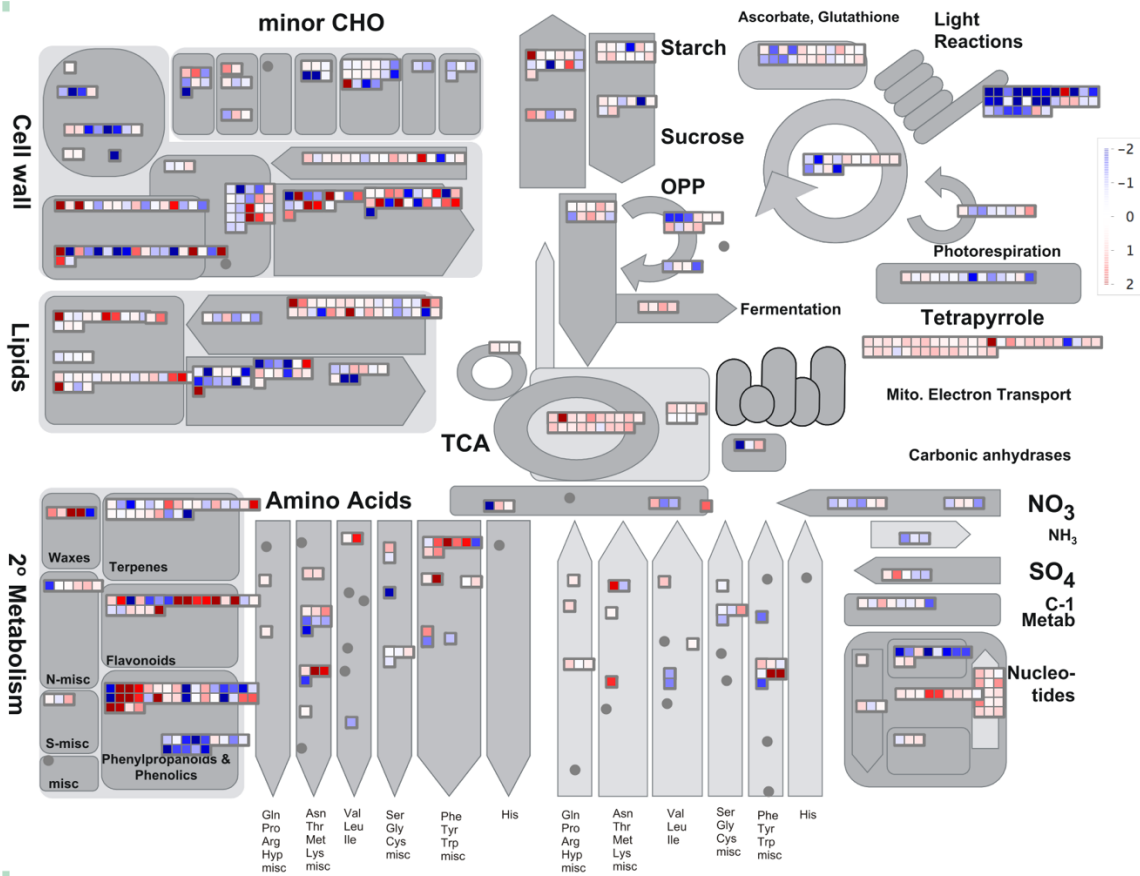

# Turning Receptacle - Red Receptacle

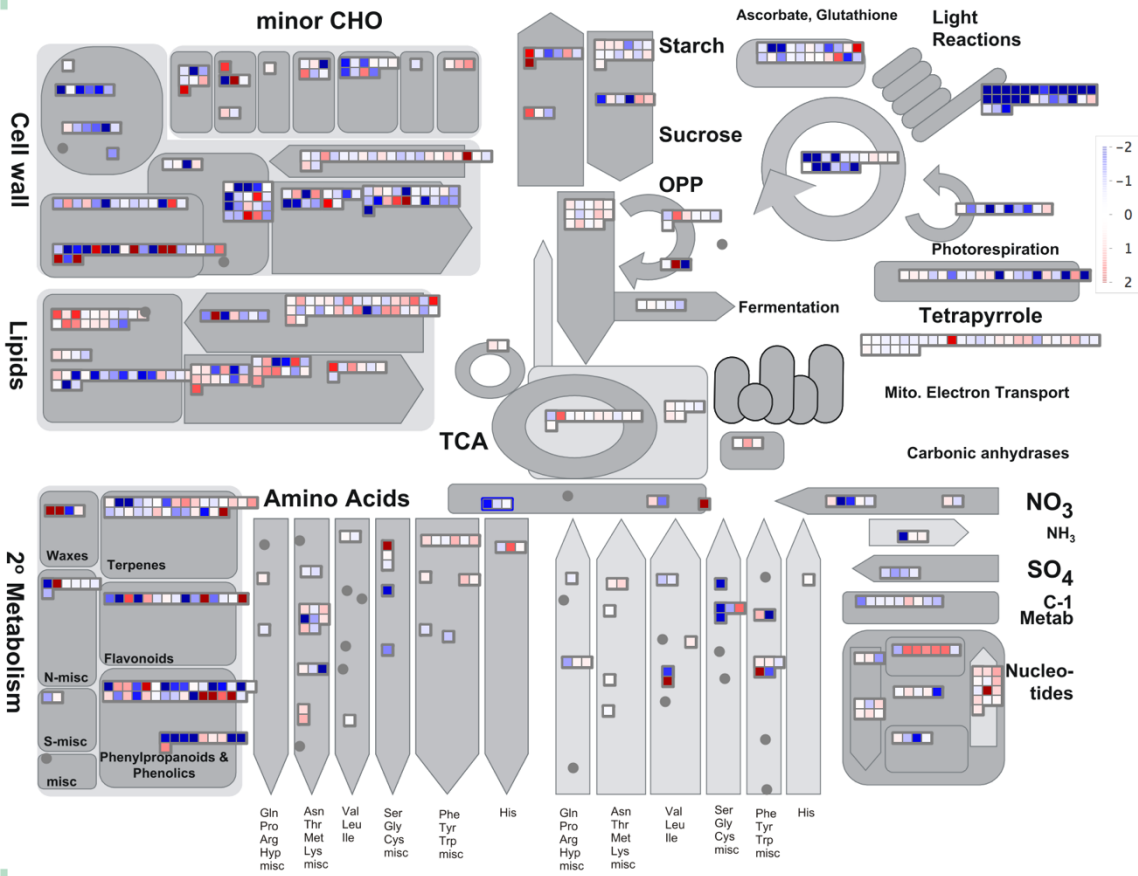



**Supplementary figure S2:** Dendrogram of the alignment of the mapped *Fragaria vesca* ERF genes with putative orthologues in *Arabidopsis*.

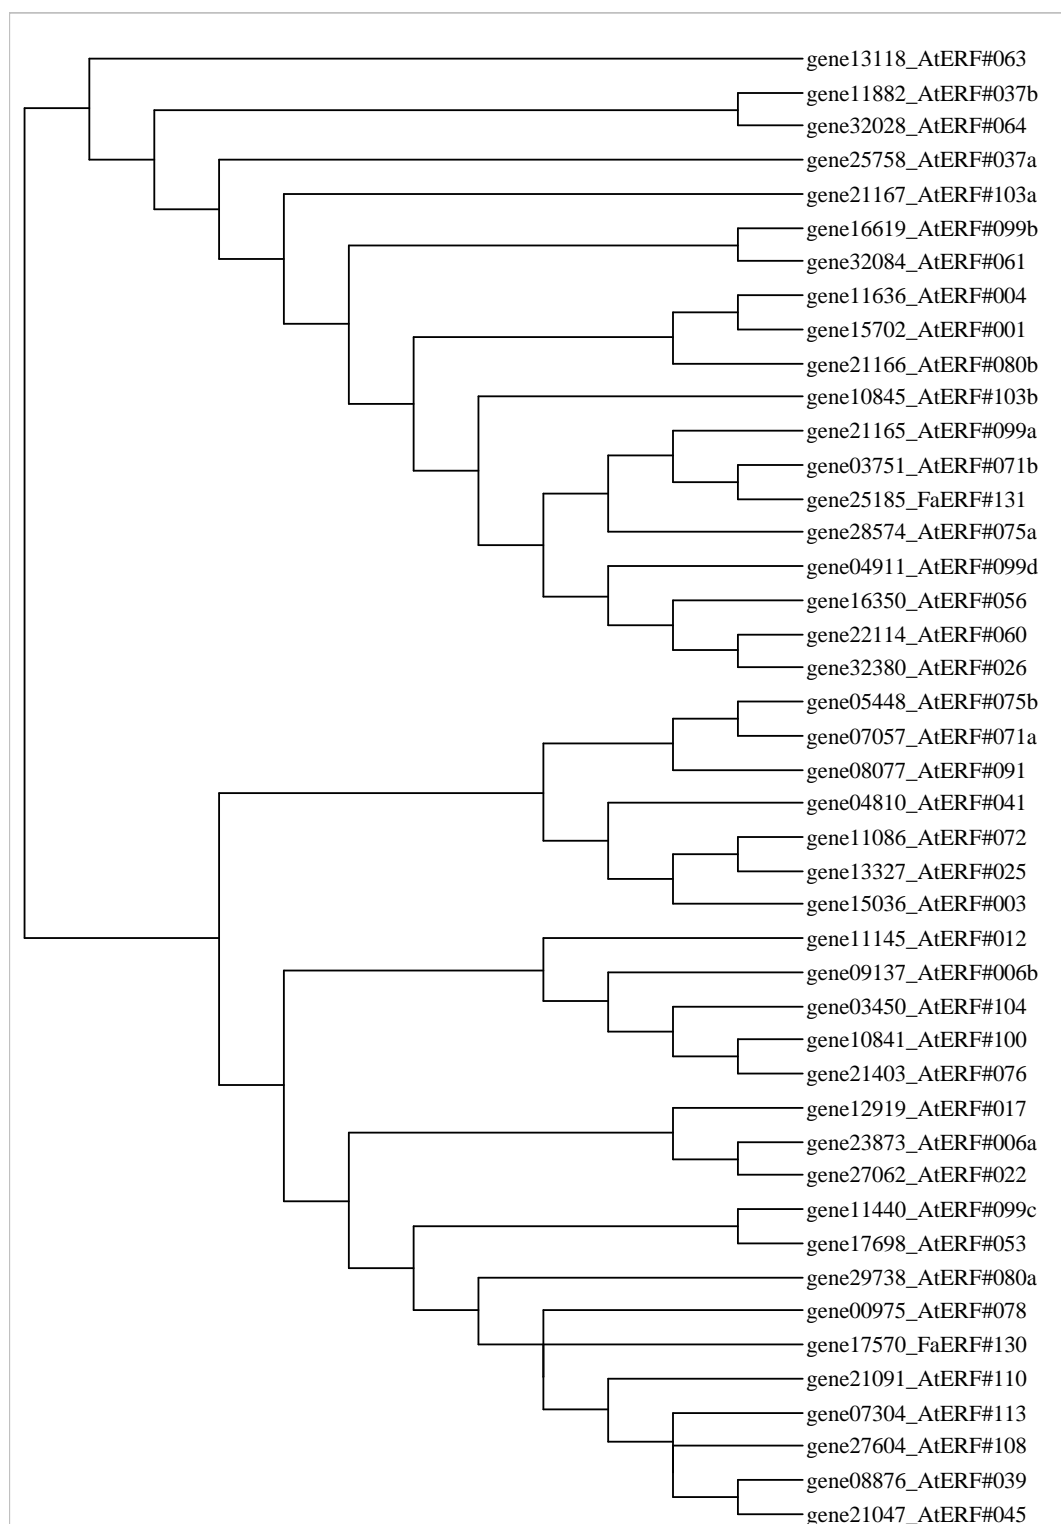

**Supplementary table S1:** Summary of the mapping of the RNA seq reads on the *Fragaria vesca* genome (Fvb\_genome).

**Supplementary table S2:** Summary of the mapping back of the RNA seq reads on the contigs assembled with the MIRA program, from the Trinity isoforms.

**Supplementary table S3:** List of the primer and conditions used for quantitative PCR assays.
